# Supplementary material for: A study of effect of Centella asiatica on oxidative markers in the hippocampus of offsprings born to alcohol-fed pregnant rats and the correlation with their cognitive functions
Source: publisher site journal article supplement (doi:10.1515/jcim-2020-0472), 2021-05-12
Supplement: Supplementary file 1 [file j_jcim-2020-0472_suppl_001.docx]

From

Dr Ganaraja Bolumbu, PhD.

Additional Professor,

Department of Physiology,

KMC., Centre for Basic Sciences, Bejai,

Mangalore – 575 004

India.

**Affiliation address:**

Dr Ganaraja Bolumbu, Department of Physiology, Kasturba Medical College, Mangalore, Manipal Academy of Higher Education, Manipal, Karnataka, India.

To,

The Editor,

[Journal of Complementary and Integrative Medicine](http://www.degruyter.com/view/j/jcim)

Sir,

Sub: Attaching the manuscript for considering for publication

I am herewith, attaching the manuscript of the Original research work done by Mitha KV, and co-authors, at Neurophysiology Laboratory of Kasturba Medical College, Mangalore, India, for your kind consideration for publication in your esteemed journal.

Title: **A study of effect of *Centella Asiatica* on Oxidative markers in the hippocampus of offsprings born to alcohol-fed pregnant rats and the correlation with their cognitive functions.**

This work is the outcome of the bona-fide research work, which has not been published or sent for publication in any other journal.

The authors declare NO CONFLICT OF INTEREST.

I kindly request you to consider the manuscript for publication.

Thanking you,

Dr Ganaraja B

Mangalore.

10.11.2020
